# Supplementary material for: Kinetic Study of the Diels–Alder Reaction between Maleimide and Furan-Containing Polystyrene Using Infrared Spectroscopy
Source: MDPI journal article supplement (doi:10.3390/polym16030441), 2024-02-05
Supplement: s1 [file s1]

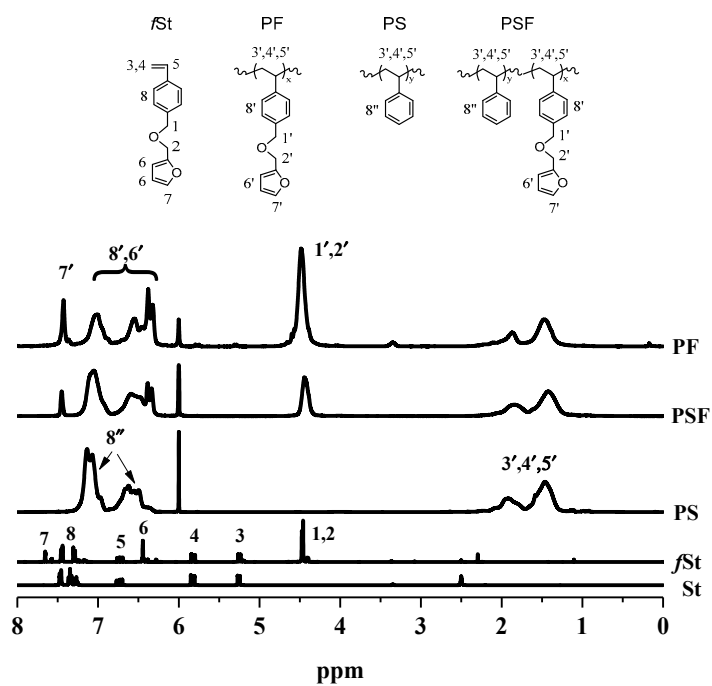

**Figure S1**  $^1\text{H}$ -NMR spectra of monomers *St* and *fSt*, homopolymers *PS* and *PF*, and copolymer *PSF*

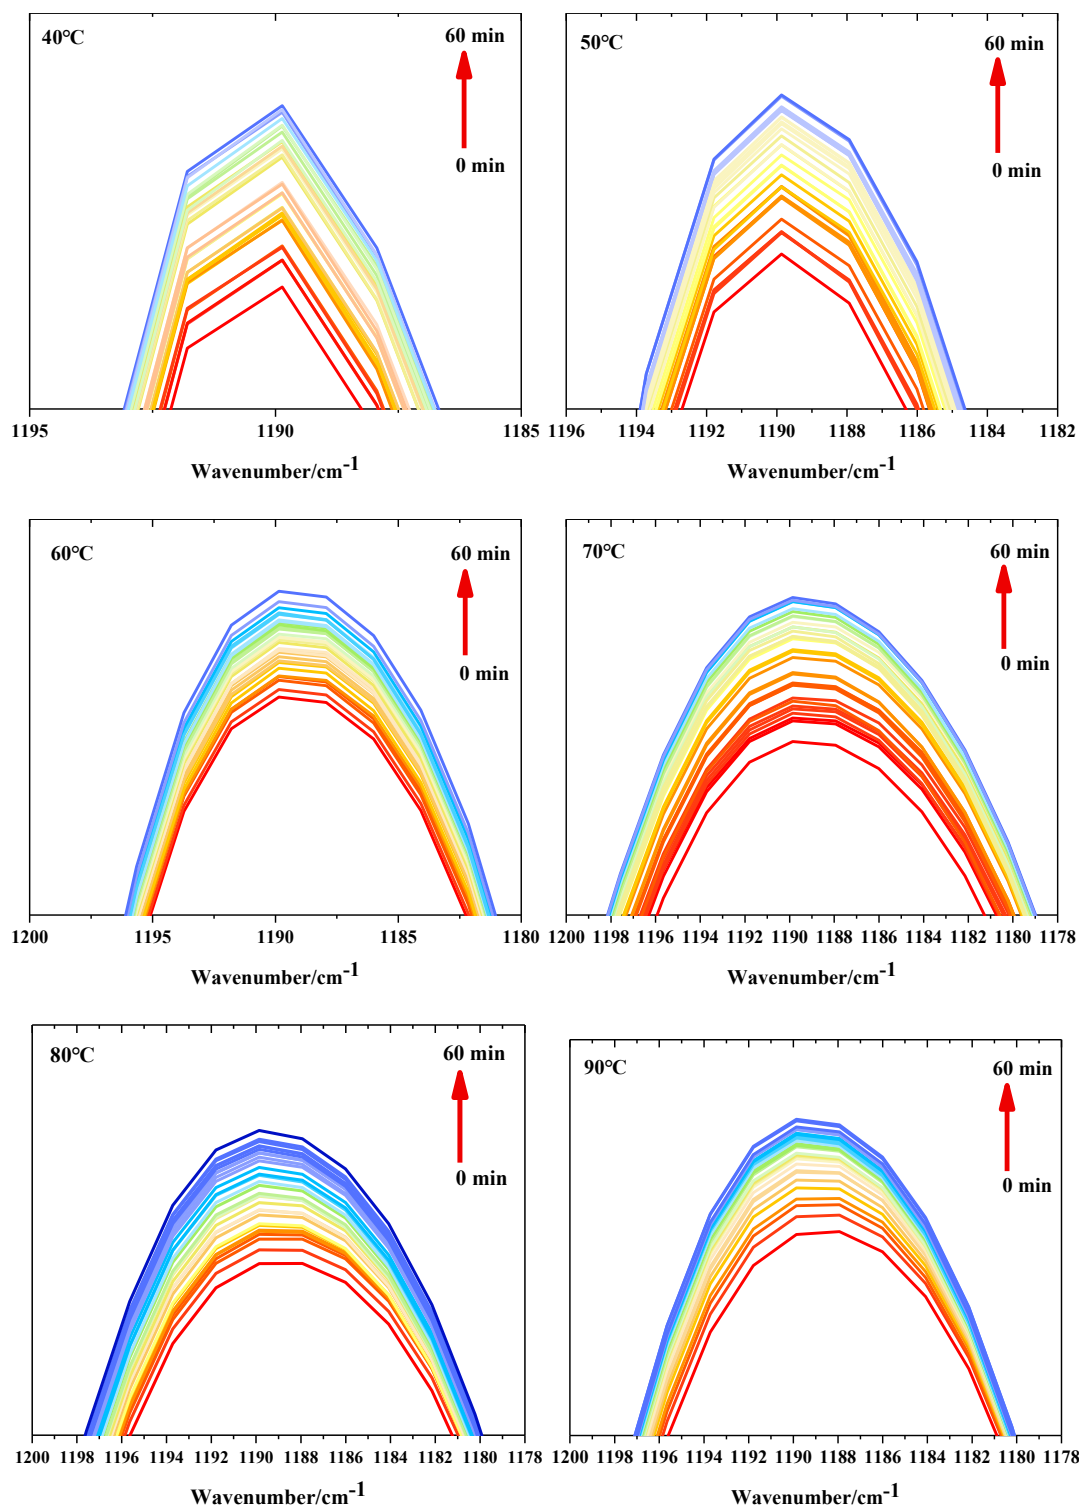

**Figure S2** The FTIR absorbance during the D-A reaction between PSF and Ma recorded with time at different temperatures: 40°C, 50°C, 60°C, 70°C, 80°C and 90°C

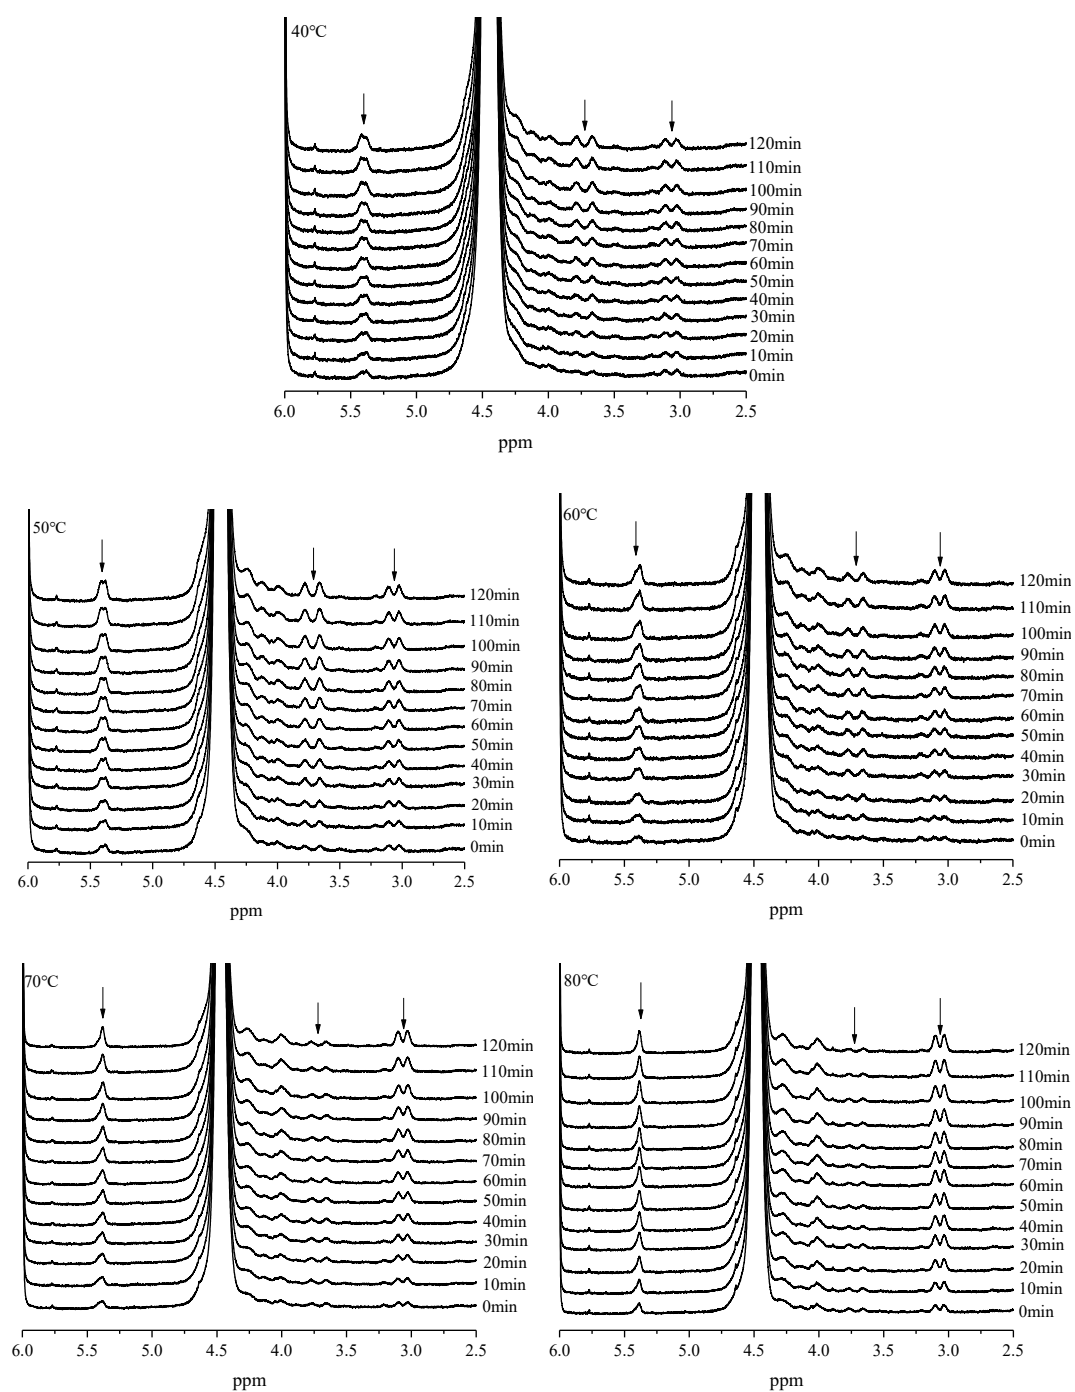

**Figure S3** The  $^1\text{H}$ -NMR spectra during the D-A reaction between PSF and Ma recorded with time at different temperatures: 40°C, 50°C, 60°C, 70°C and 80°C

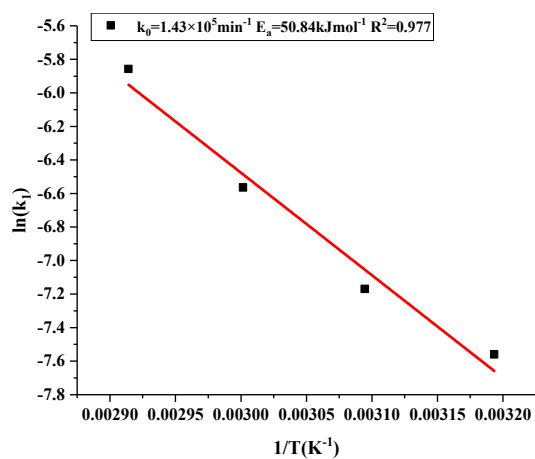

(A)

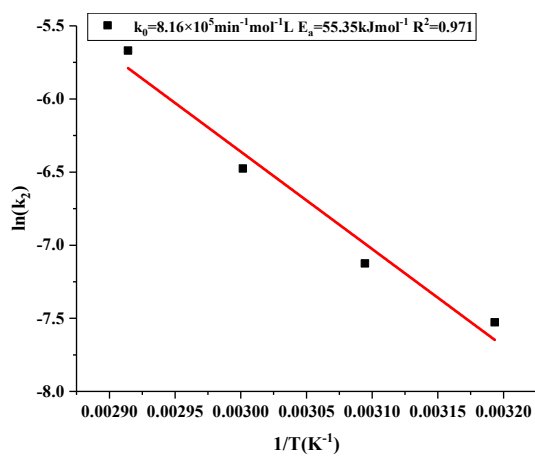

(B)

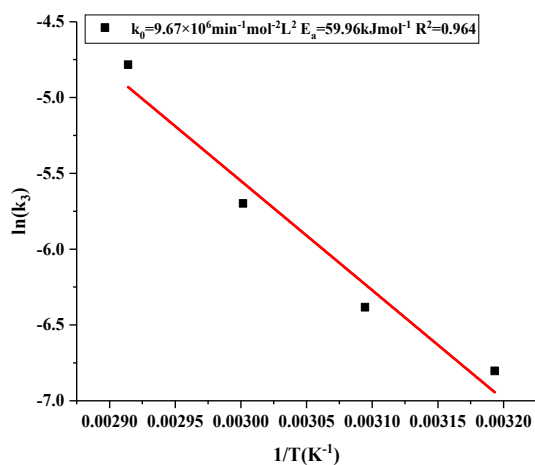

(C)

**Figure S4** Fitting the Arrhenius plot to (A) first-order, (B) second-order, and (C) third-order reaction to determine the  $E_{a,D-A}$  and  $k_{0,D-A}$  of the D-A reaction between PSF and Ma based on the  $^1\text{H-NMR}$  results

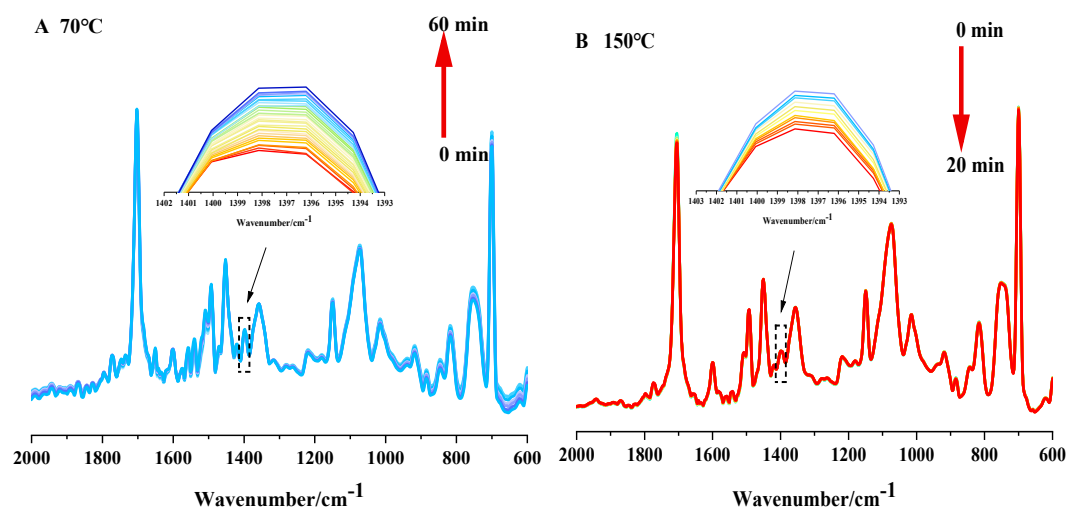

**Figure S5** FTIR spectra of (A) holding the temperature at 70°C for 60 min and (B) holding the temperature at 150°C for 20min

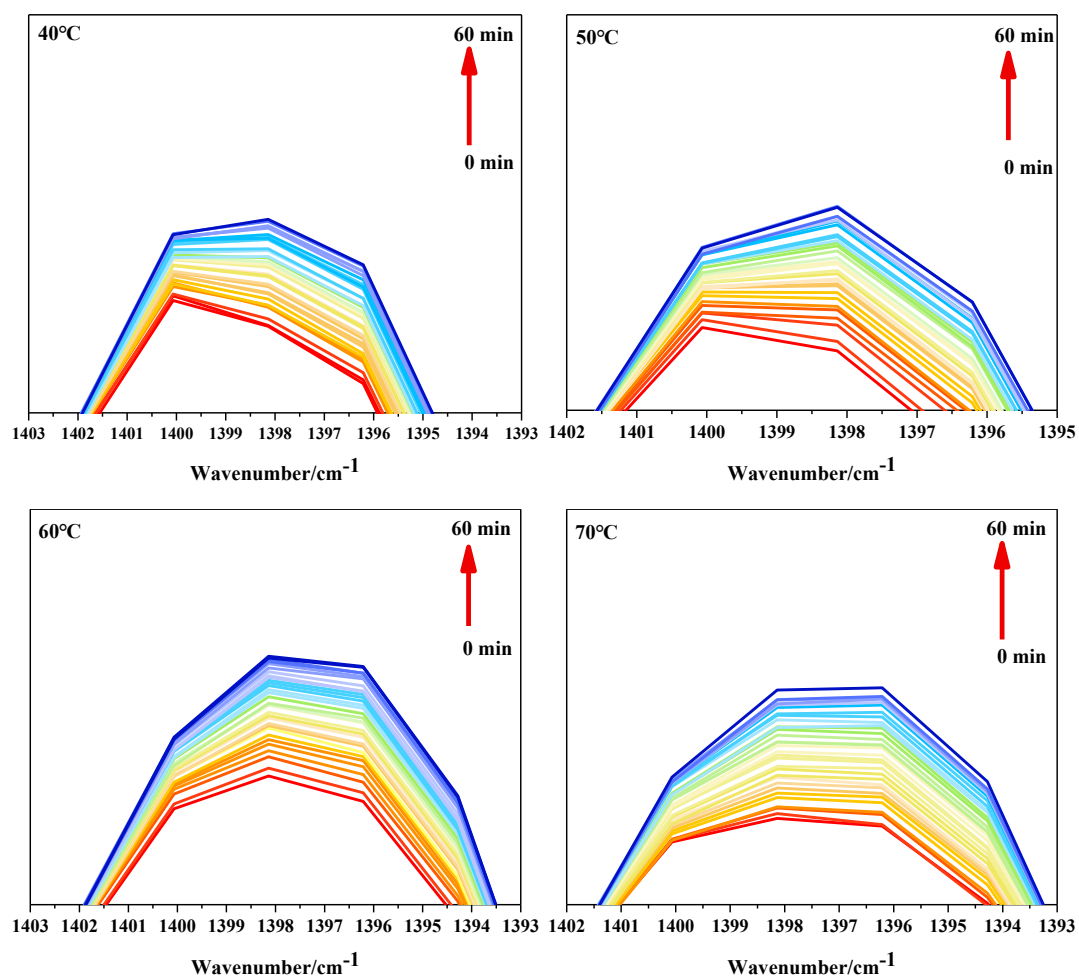

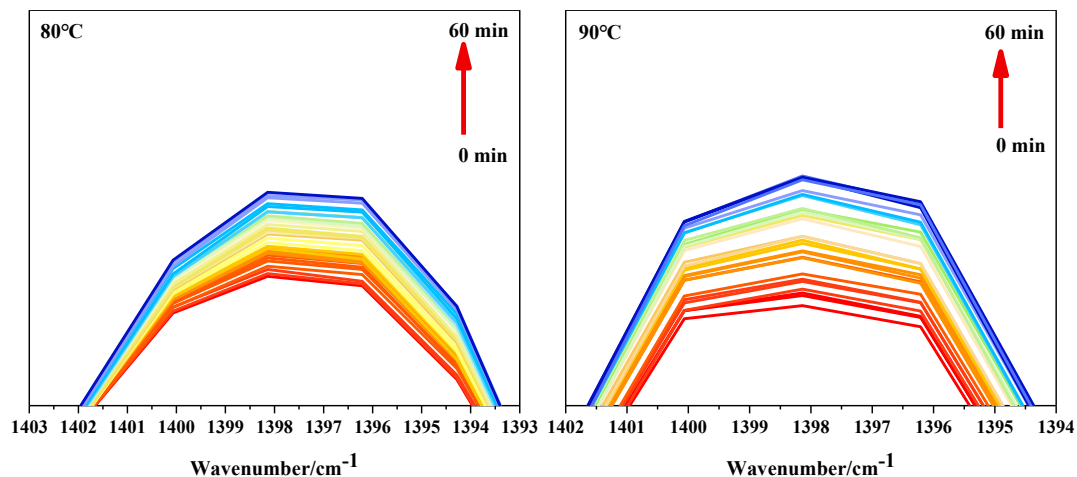

**Figure S6** The FTIR absorbance during the D-A reaction between PSF and Mb recorded with time at different temperatures: 40°C, 50°C, 60°C, 70°C, 80°C and 90°C

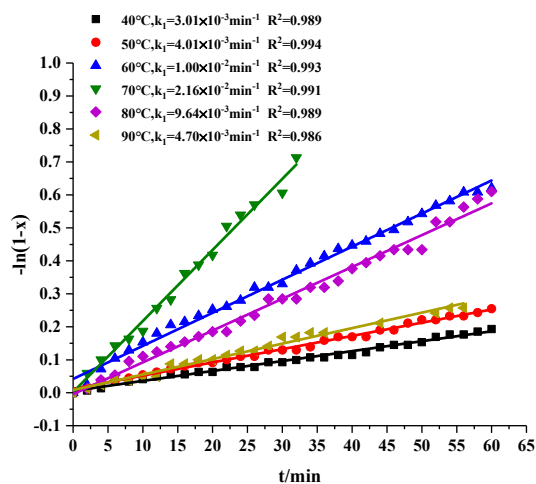

(A)

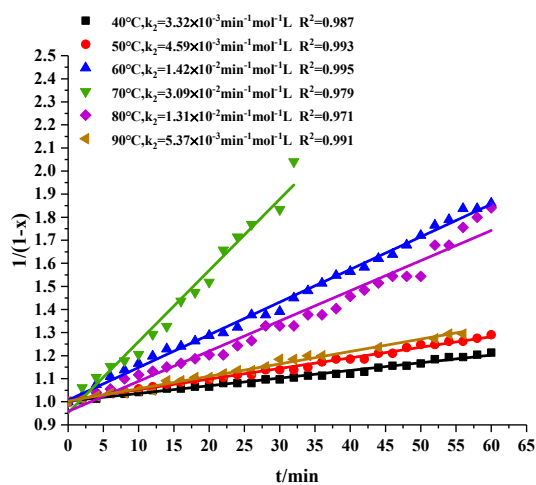

(B)

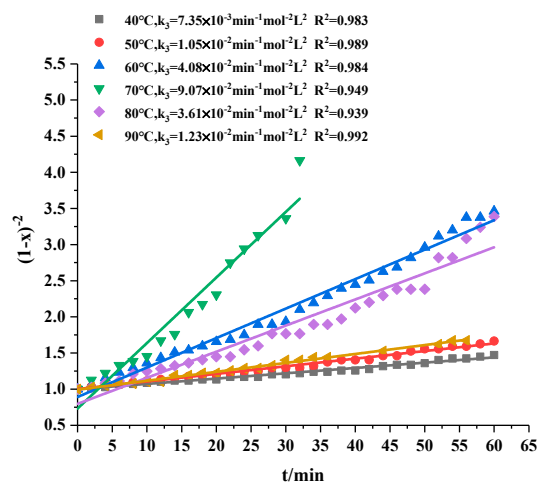

(C)

**Figure S7** Fitting the conversion data to (A) first-order, (B) second-order, and (C) third-order reaction kinetics to determine the apparent kinetic coefficient  $k_{app}$  of D-A reaction between PSF and Mb at 40°C, 50°C, 60°C, 70°C, 80°C and 90°C based on the FTIR results

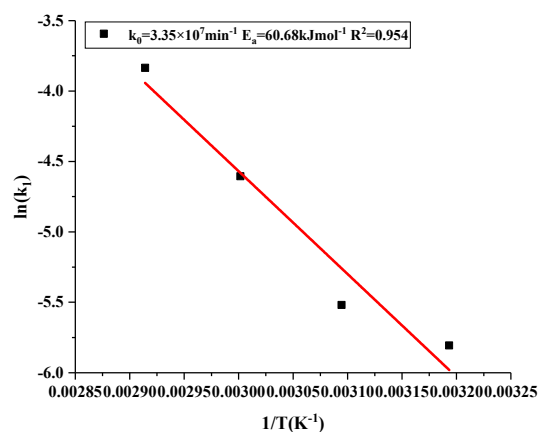

(A)

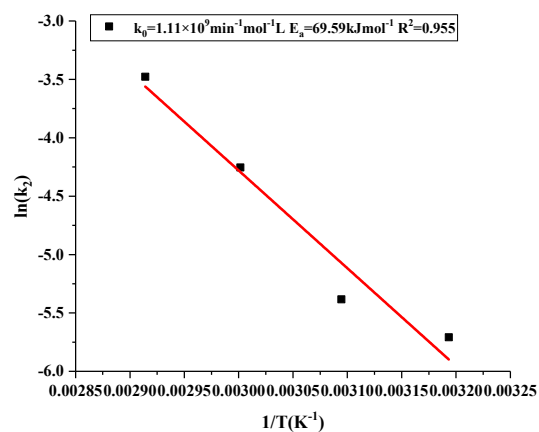

(B)

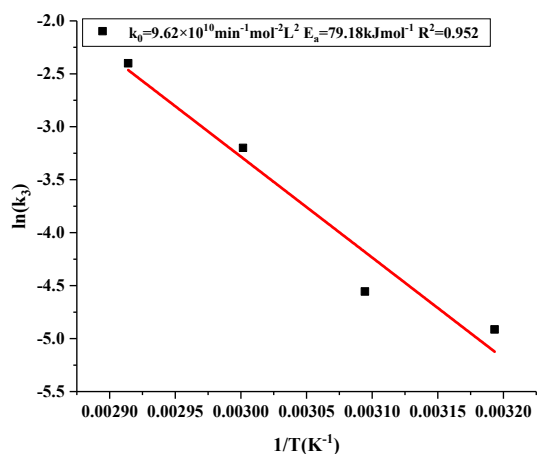

(C)

**Figure S8** Fitting the Arrhenius plot to (A) first-order, (B) second-order, and (C) third-order reaction to determine the  $E_{a,D-A}$  and  $k_{0,D-A}$  of the D-A reaction between PSF and Mb based on the FTIR results

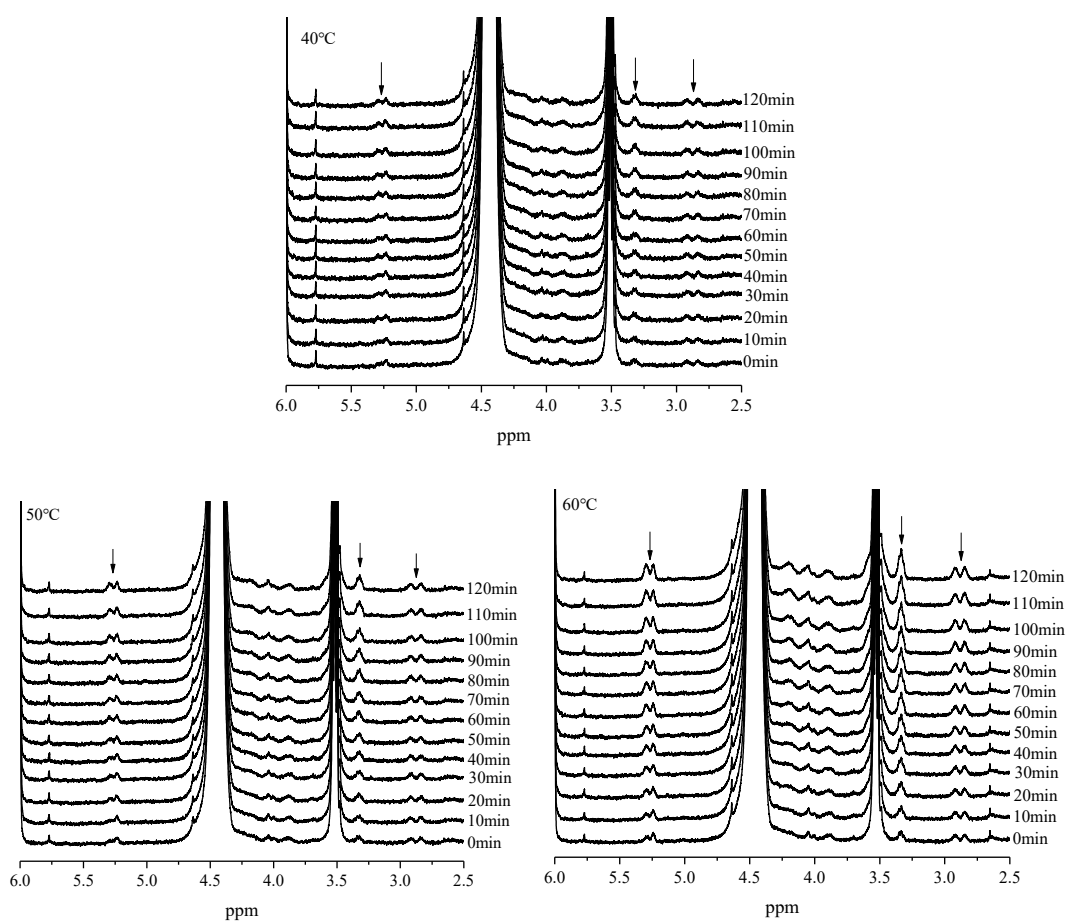



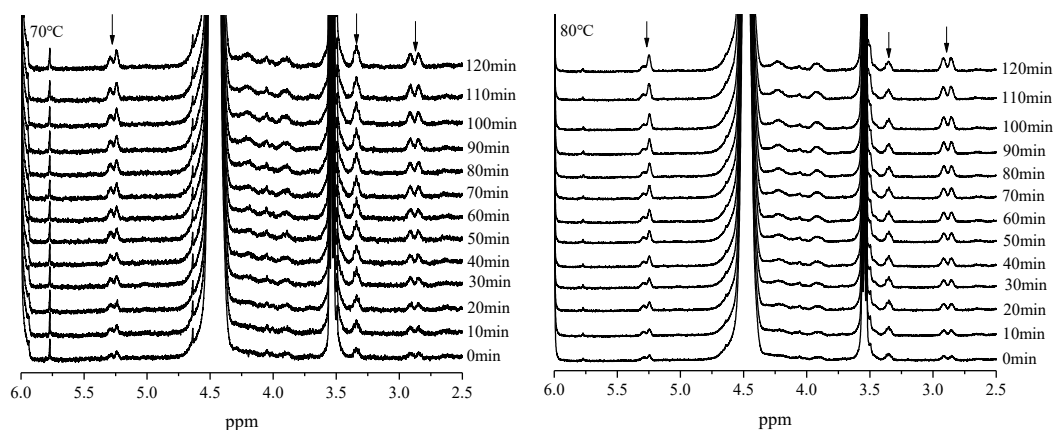

**Figure S9** The  $^1\text{H}$ -NMR spectra during the D-A reaction between PSF and Mb recorded with time at different temperatures: 40°C, 50°C, 60°C, 70°C and 80°C

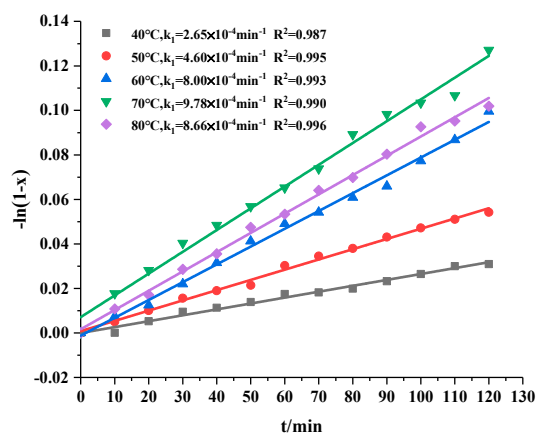

(A)

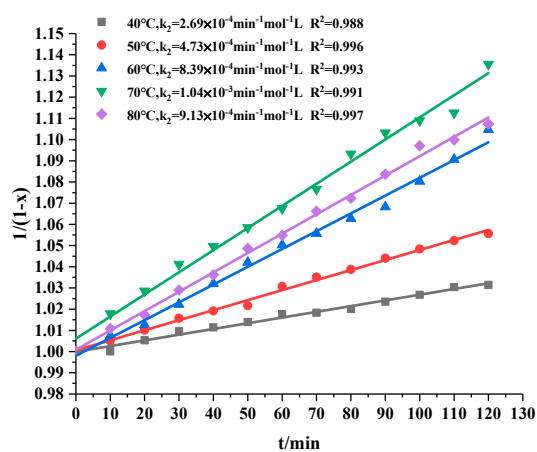

(B)

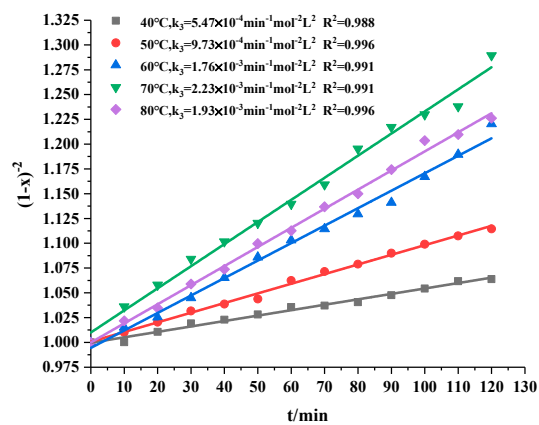

(C)

**Figure S10** Fitting the conversion data to (A) first-order, (B) second-order, and (C) third-order reaction kinetics to determine the apparent kinetic coefficient  $k_{\text{app}}$  of D-A reaction between PSF and Mb at 40°C, 50°C, 60°C, 70°C and 80°C based on the  $^1\text{H}$ -NMR results

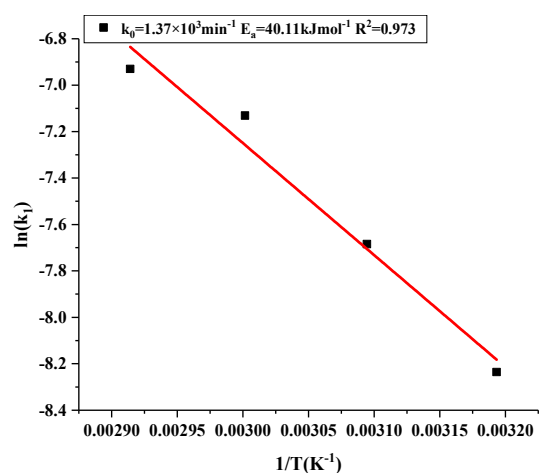

(A)

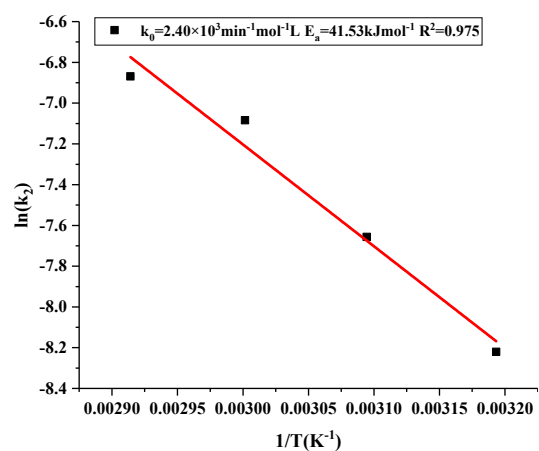

(B)

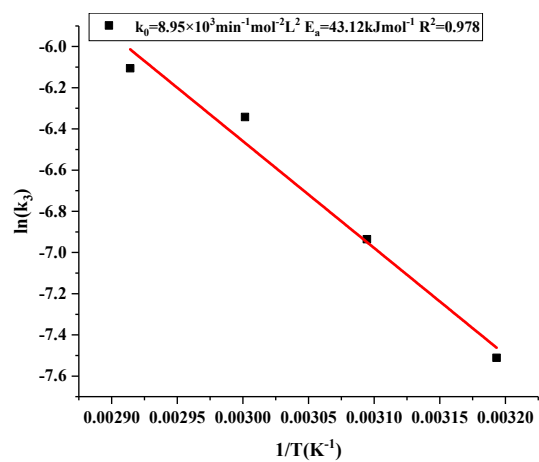

(C)

**Figure S11** Fitting the Arrhenius plot to (A) first-order, (B) second-order, and (C) third-order reaction to determine the  $E_{a,D-A}$  and  $k_{0,D-A}$  of the D-A reaction between PSF and Mb based on the  $^1\text{H-NMR}$  results
